# Supplementary material
Source: publisher figshare collection journal article supplement (https://adisjournals.figshare.com/ndownloader/files/38476292)

# Comparative Effectiveness of Carbidopa/Levodopa Enteral Suspension and Deep Brain Stimulation on Pill Burden Reduction in Medicare Fee-for-Service Patients with Advanced Parkinson's Disease

Michael J. Soileau, Fernando L. Pagan, Alfonso Fasano, Ramon Rodriguez-Cruz, Connie H. Yan, Niodita R. Gupta, Christie L. Teigland, Zulkarnain Pulungan, Jill K. Schinkel, Prasanna L. Kandukuri, Omar A. Ladhani, Mustafa S. Siddiqui

## ORAL PARKINSON'S DISEASE MEDICATIONS

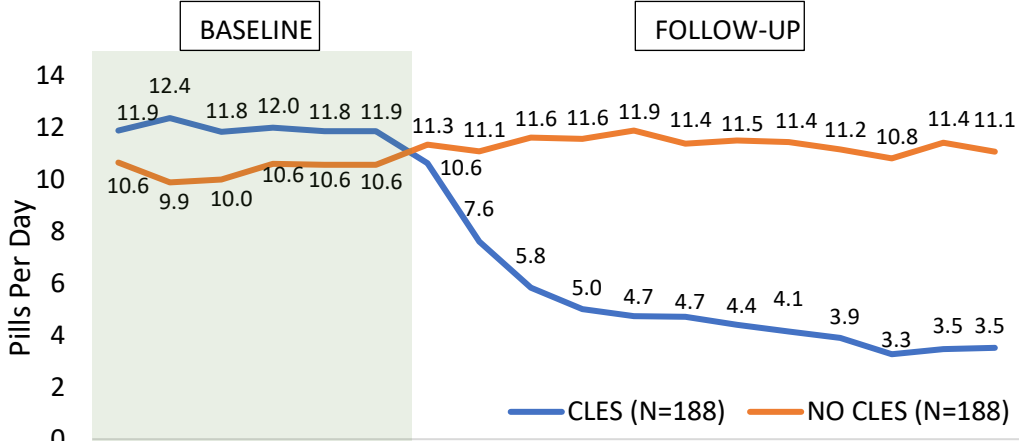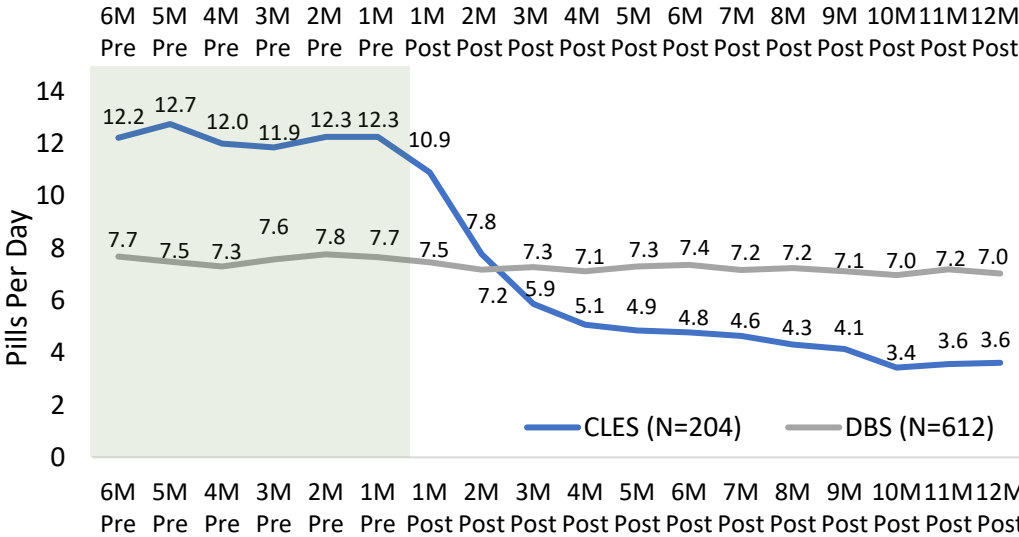

## LEVODOPA EQUIVALENT DAILY DOSES

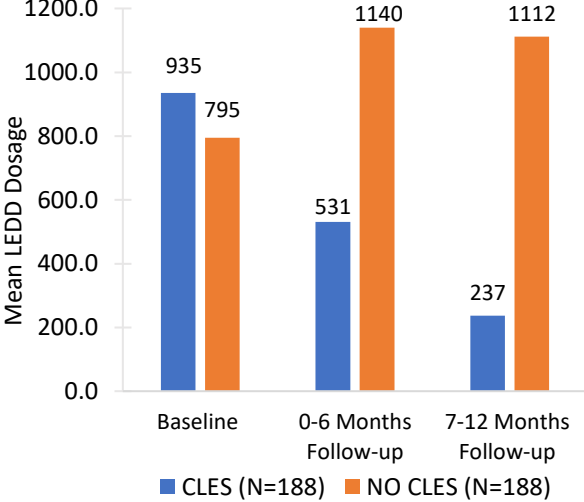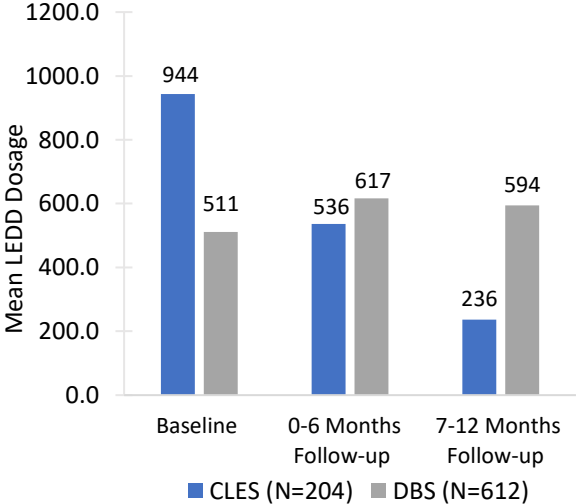

**OBJECTIVE:** Device-aided therapies of **Carbidopa/Levodopa Enteral Suspension (CLES)** and **Deep Brain Stimulation (DBS)** were compared for their efficacy to reduce oral pill burden and levodopa equivalent daily dose in 100% Medicare Fee-For-Service patients with Advanced Parkinson's Disease (APD).

**METHODS:** In this retrospective cohort study from 2014-2018, patients receiving **CLES** were propensity matched 1:1 with **CLES eligible patients who did not receive treatment (NO CLES)** and 1:3 with those receiving **DBS**. Oral pill burden and levodopa equivalent daily doses (LEDD) were assessed 6 months prior to treatment (baseline) and 0-6 months and 7-12 months after treatment (follow-up).

**RESULTS:** Mean age and gender distribution were similar between matched **CLES** and **NO CLES** (71.9 vs 72.0) and **CLES** and **DBS** (71.6 vs 71.7). Patients who initiated **CLES** had significantly reduced oral pill burden with concomitant lower LEDD compared to **NO CLES** and to patients with **DBS**.

**CONCLUSION:** The significant reduction in oral pills per day and LEDD observed with **CLES** suggests that pill burden reduction could be considered a treatment goal for patients with APD challenged by complex polypharmacy regimens.

PEER-REVIEWED  
FEATURE

The infographic represents the opinions of the authors.

For a full list of declarations, including funding and author disclosure statements, and copyright information, please see the full text online.

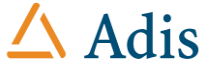

Supplement: Supplementary file 1 [file 38476292]
